# Supplementary material
Source: MDPI journal article supplement (https://www.mdpi.com/2073-4441/13/21/2943)
Supplement: s1 [file s1 › water-1408825-supplementary.pdf]

## Supplementary material

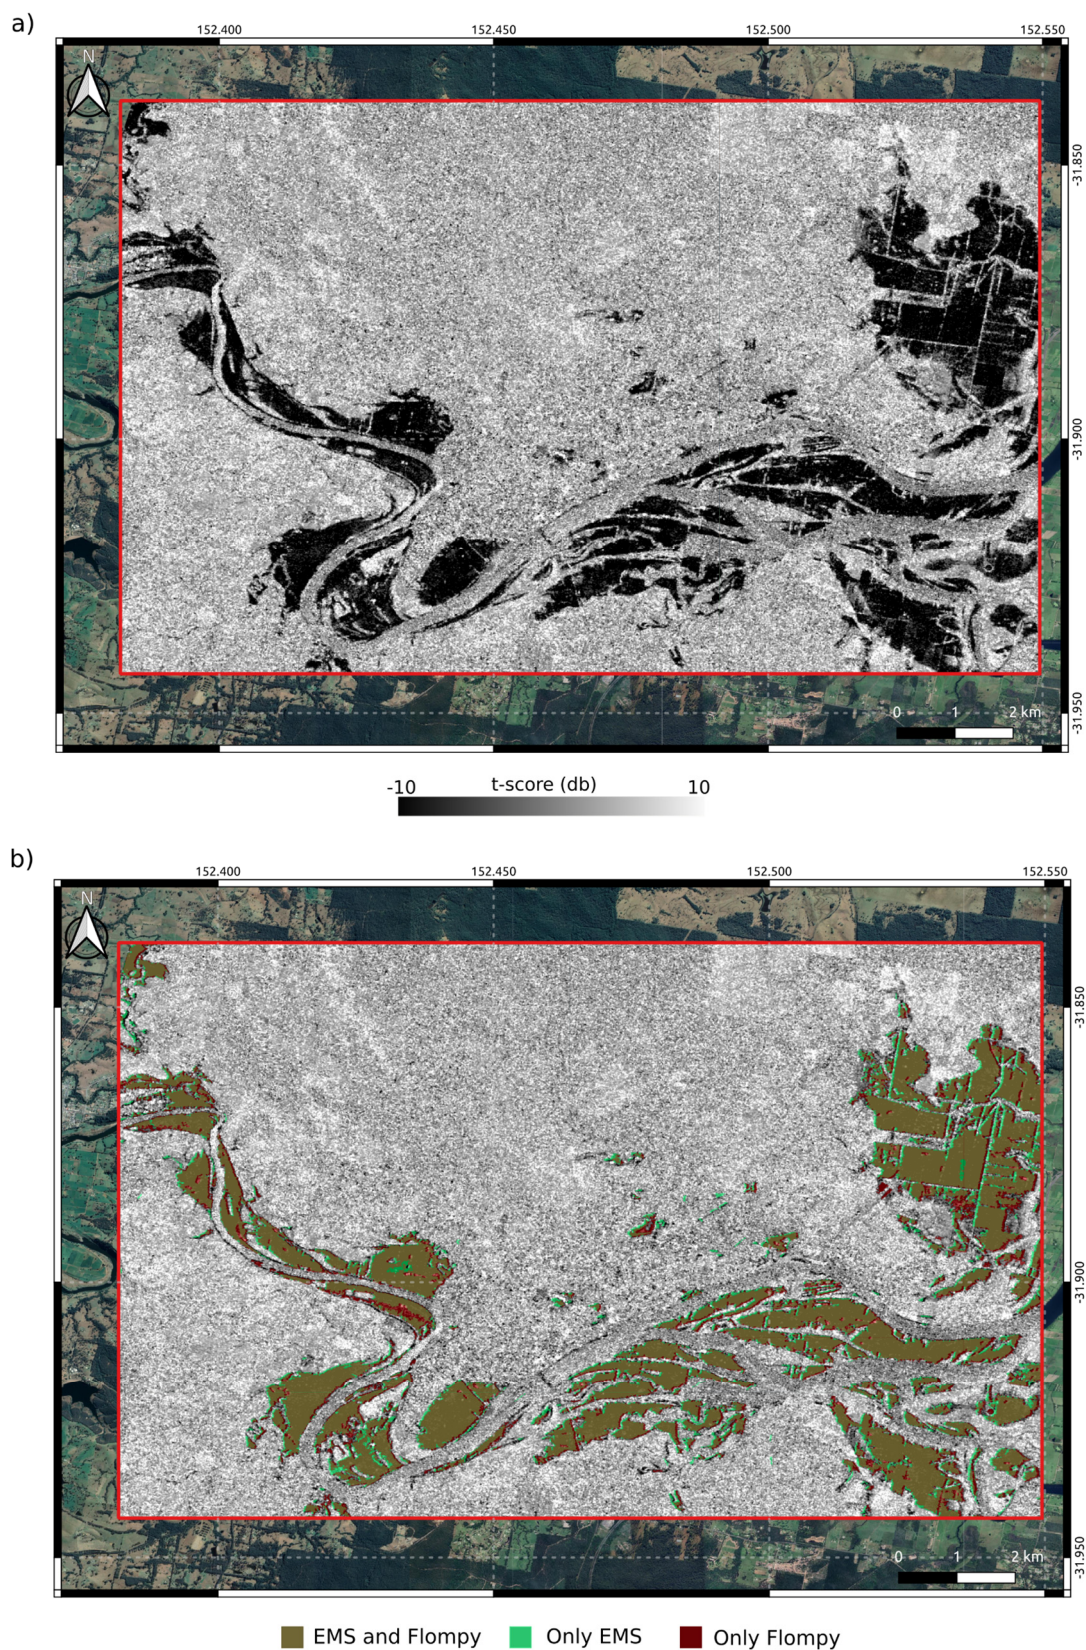

**Figure S1.** Validation figure for EMSR504. a) T-scores of the Sentinel-1 intensity dataset b) Floppy and EMS results overlaid over t-score image.

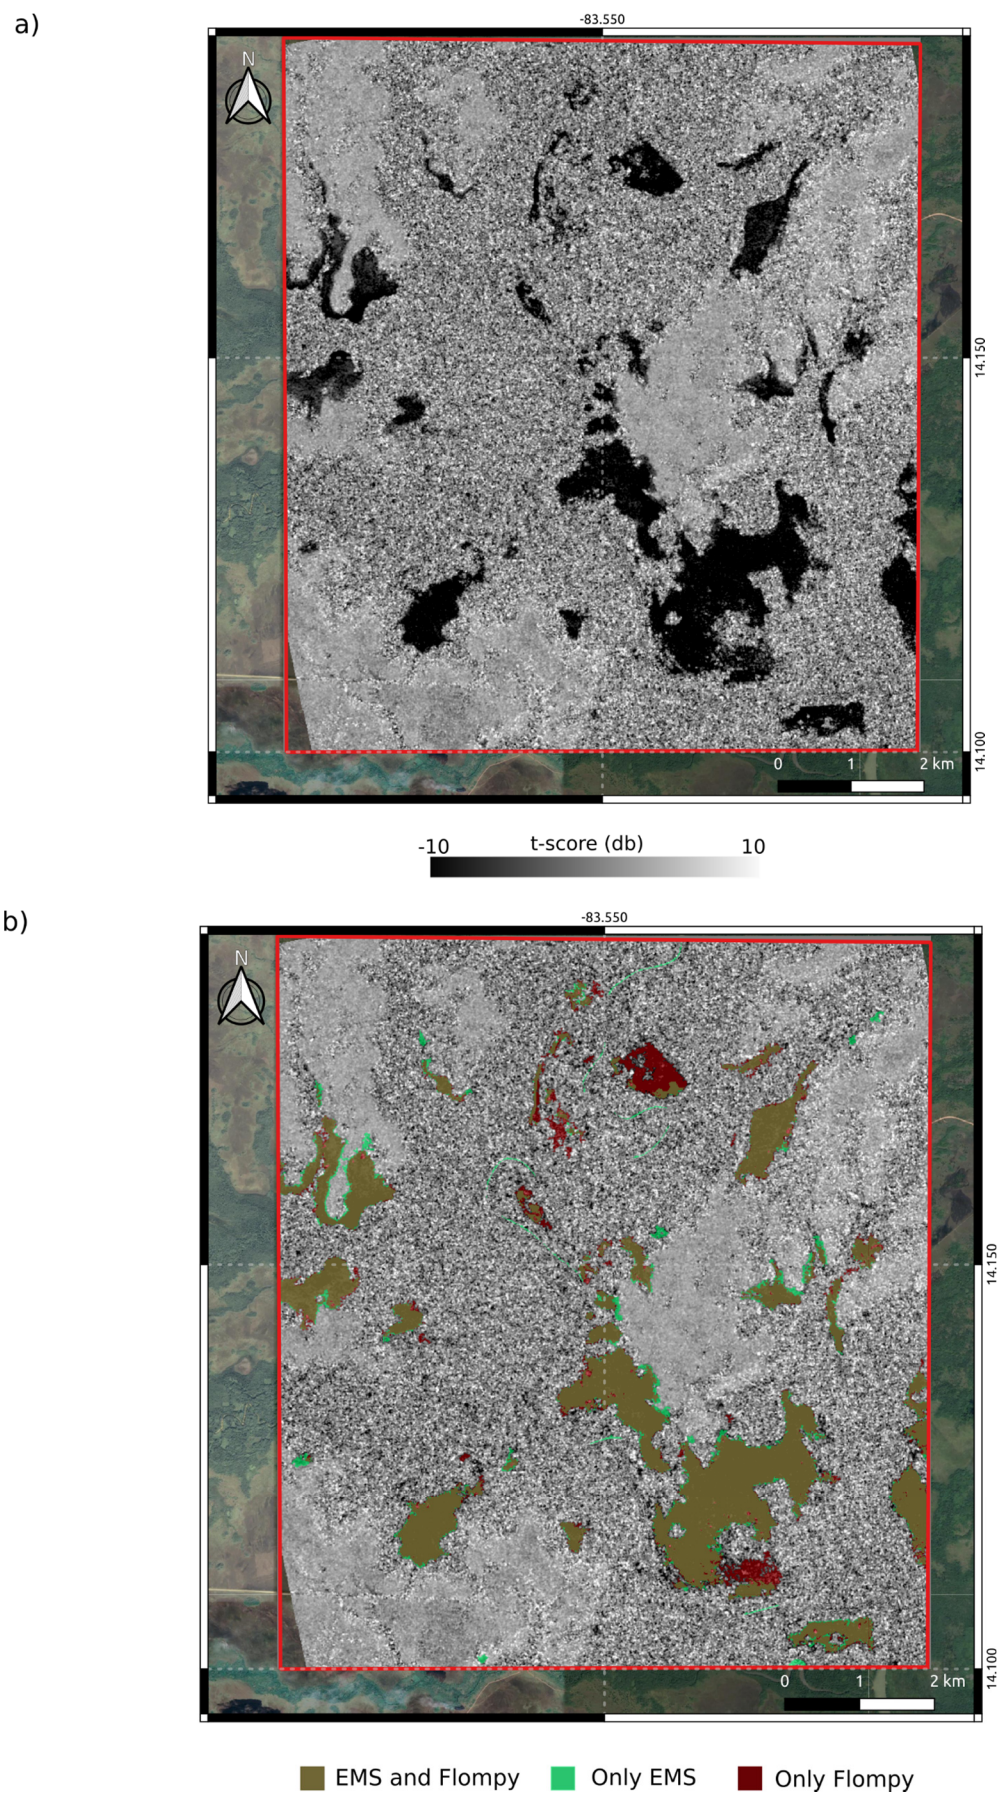

**Figure S2.** Validation figure for EMSR456. a) T-scores of the Sentinel-1 intensity dataset b) Flompy and EMS results overlaid over t-score image.

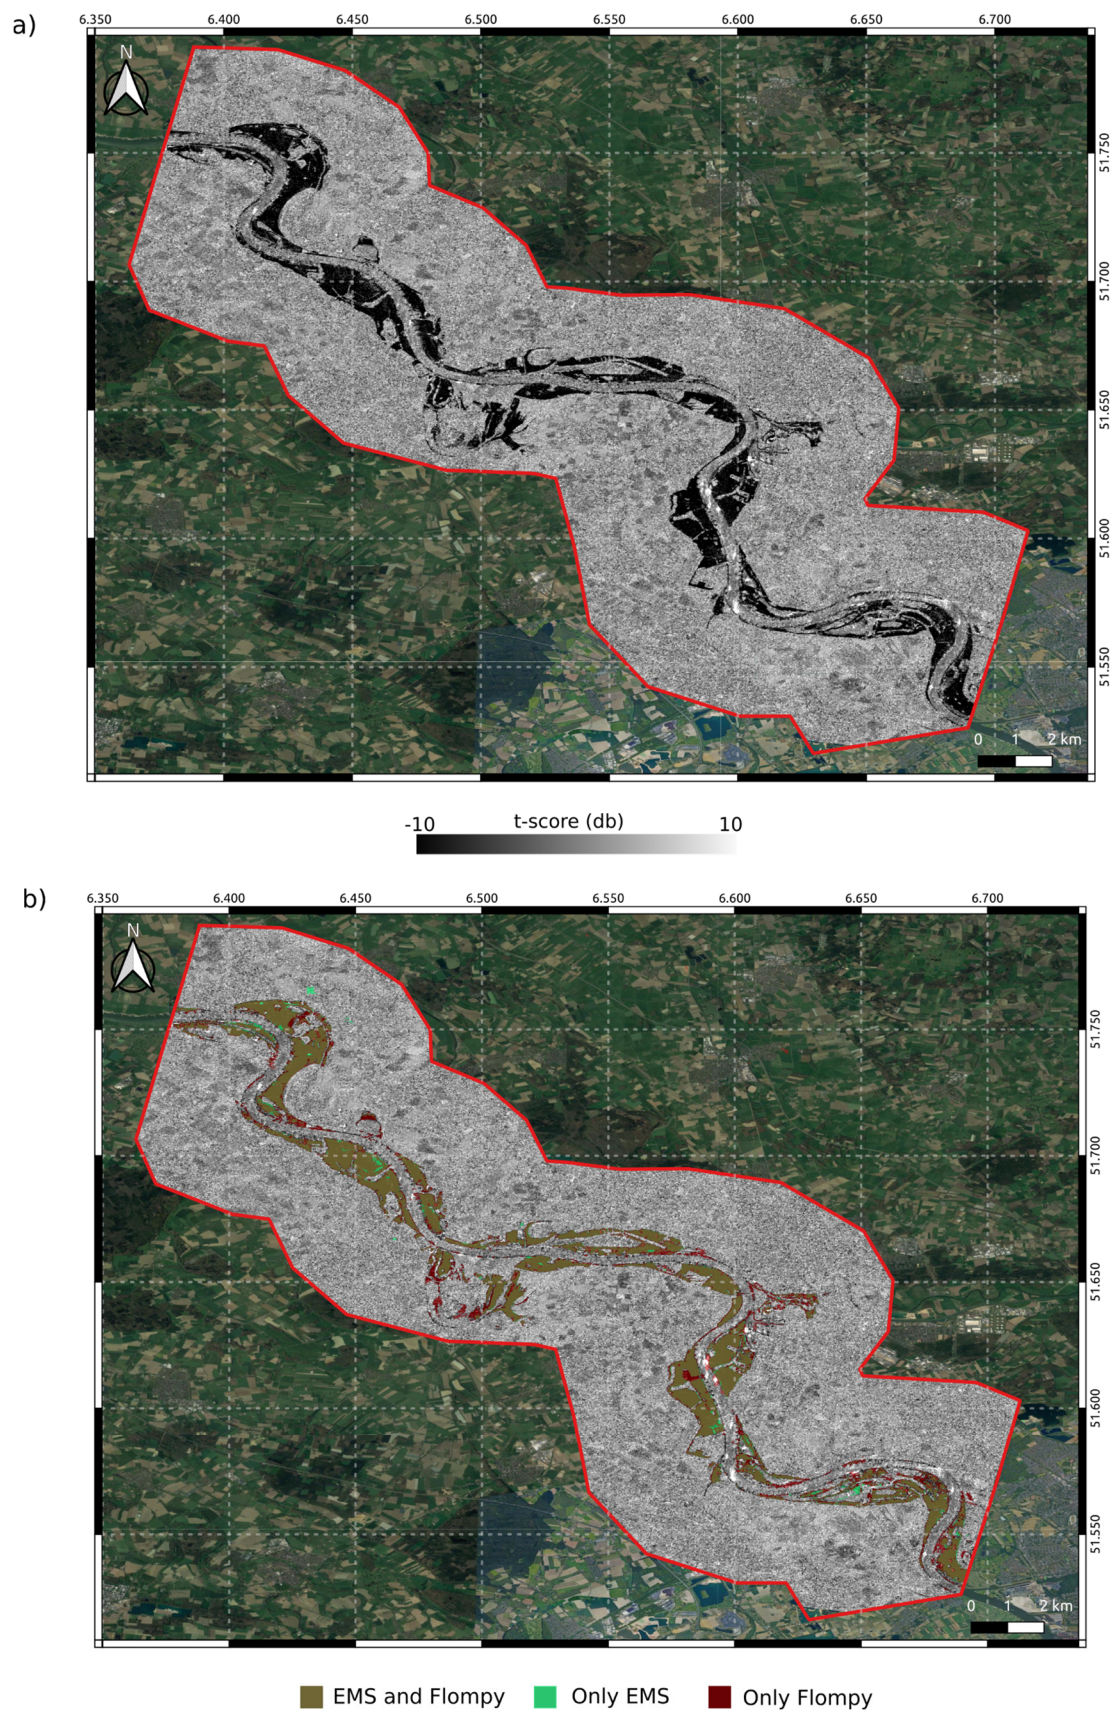

**Figure S3.** Validation figure for EMSR497. a) T-scores of the Sentinel-1 intensity dataset b) Flompy and EMS results overlaid over t-score image.

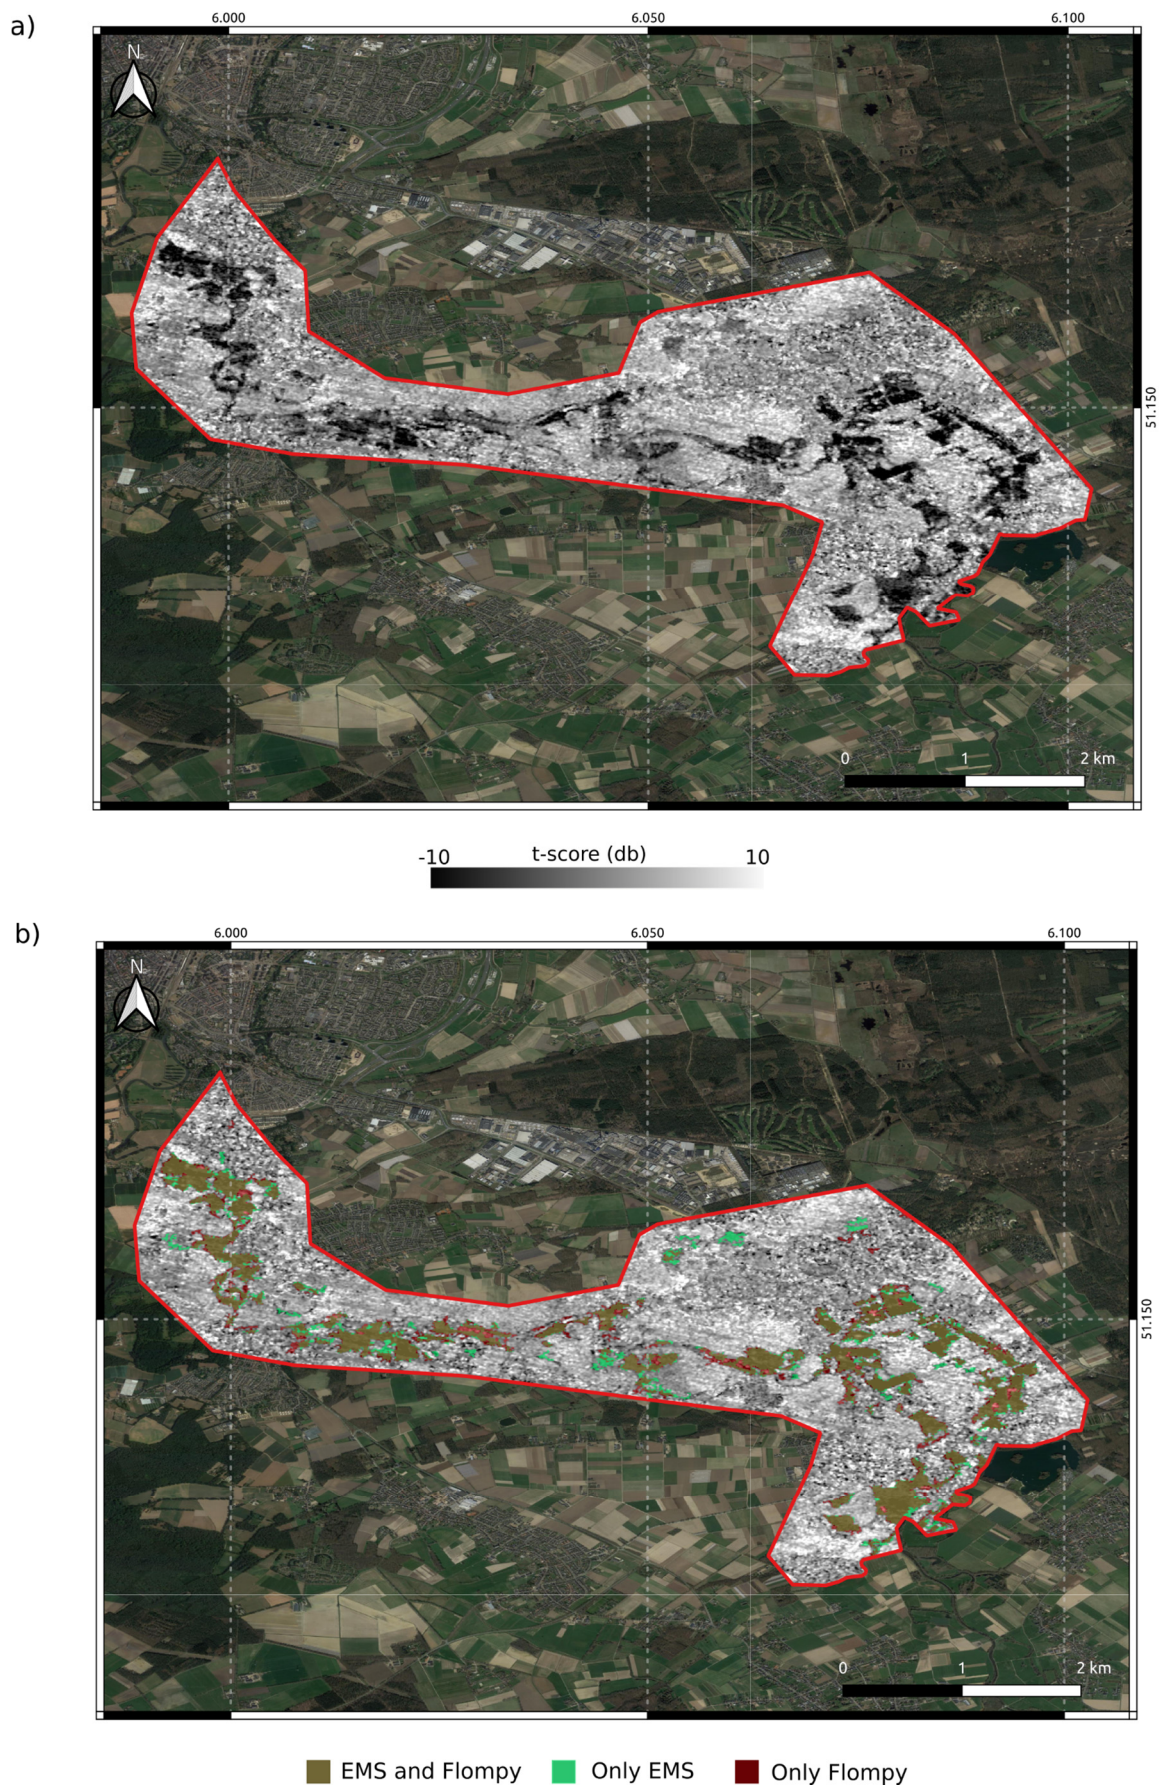

**Figure S4.** Validation figure for EMSR520. a) T-scores of the Sentinel-1 intensity dataset b) Flompy and EMS results overlaid over t-score image.
